# Supplementary material for: Reduced miR-371b-5p expression drives tumor progression via CSDE1/RAC1 regulation in triple-negative breast cancer
Source: PubMed Central journal article supplement (PMC9135623; doi:10.1038/s41388-022-02326-6), 2022-04-30
Supplement: 41388_2022_2326_MOESM1_ESM.pdf [file 41388_2022_2326_MOESM1_ESM.pdf]

## 1 **Supplementary Methods**

### 2 **Breast cancer patient sample**

3 Patients who were diagnosed with and treated for breast cancer at Seoul National  
4 University Hospital were included in this study. Tumor and adjacent normal tissues were  
5 surgically resected from patients in each subtype group at Seoul National University Hospital.  
6 Ten tumors and 10 paired adjacent normal tissues were used for the miRNA microarray analysis,  
7 and the numbers and types of patients were as follows: luminal A (n=2), luminal B (n=2), HER2  
8 (n=3), and TNBC (n=3). Thirteen tumor tissues were analyzed to confirm miR-371b-5p  
9 expression using qPCR. The range of initial surgical age of the patients used for the miRNA  
10 microarray analysis was 36–59 years. Tumor blocks were harvested from the tumor cores and  
11 normal tissues were derived from the same patients at a location at least 5 cm away from the  
12 cancer lesion. Absence of cancer cells in the normal tissues was confirmed through H&E  
13 staining and microscopic examination. Tissues were stored in nitrogen tanks at a tissue bank  
14 (Laboratory of Breast Cancer Biology, Seoul National University College of Medicine, Seoul,  
15 Korea).

### 16 **Ethics approval and consent to participate**

17 Tumor and adjacent normal tissues were surgically resected from patients in each  
18 subtype group at Seoul National University Hospital. Informed consent was obtained from all  
19 patients before collection of the specimens, and the study was approved by the Institutional  
20 Review Board of Seoul National University Hospital (IRB number: 1704-019-843).

### 21 **miRNA and mRNA profiling**

22 Total RNA was isolated using TRIzol Reagent (Thermo Fisher Scientific, MA, USA)  
23 and purified using chloroform and isopropanol for miRNA microarray analysis on an Agilent  
24 G4872A platform (Illumina, Inc., CA, USA). First, isolated total RNA was amplified using an  
25 Illumina TotalPrep RNA amplification kit (Invitrogen, CA, USA) to yield biotinylated cRNA,

26 according to the manufacturer's instructions. The labeled cRNA was hybridized to each  
27 HumanHT-12 expression v2 BeadChip array. The value of probe signals was transformed into  
28 log-scale and normalized using the quantile method. Data analysis was performed as described  
29 previously (1).

### 30 **Survival and molecular subtype association analysis**

31 The Kaplan-Meier (KM) plotter tool was used to show the correlation between miR-  
32 371-5p expression or CSDE1 and overall survival (OS) in patients with breast cancer (2).  
33 Survival analysis according to CSDE1 and RAC1 expression was analyzed using the Cancer  
34 Target Gene Screening Tool (3). Subtype-specific *CSDE1* expression analysis was performed  
35 using the cBioportal (4, 5) on The Cancer Genome Atlas (TCGA) breast cancer dataset (6).  
36 *CSDE1* mRNA expression was classified using PAM50 subtyping. TNBC patients were  
37 automatically split by KMplot into two groups with high (n=52) and low (n=151) levels of  
38 miR-371b-5p (expression range: 6-7, cutoff value: 6.51, HR: 0.44). Chemotherapy-treated  
39 TNBC patients were automatically split by KMplot into two groups with high (n=31) and low  
40 (n=79) levels of miR-371b-5p expression (expression range: 6-7, cutoff value: 6.5, HR: 0.38).  
41 The settings for specifying the chemotherapy group were as follows: Cohorts, systemically  
42 treated patients; ER-positive endocrine therapy, any; Chemotherapy, include all. Lymph node-  
43 positive TNBC patients were automatically split by KMplot into two groups with high (n=21)  
44 and low (n=46) levels of CSDE1 expression (expression range: 921-7722, cutoff value: 3758).  
45 The settings for specifying the lymph node-positive TNBC patients were as follows: Lymph  
46 node status, positive; Intrinsic subtype, basal. The relative expression value was indicated as  
47 the number of standard deviations away from the mean expression value in the reference  
48 population (Z-score).

### 49 **Animal studies**

50

51 Female Balb/c Nude mice at 7 weeks from Orient Bio (Korea) were used in the  
52 xenograft studies. All procedures for nude mice were approved by the Animal Care and Use  
53 Committee of Yonsei University Medical School and performed in specific pathogen-free  
54 facility under conditions in accordance with the Guidelines for the Care and Use of Laboratory  
55 Animals of Yonsei University Medical School. All animal experiments were approved by the  
56 institutional review board (IRB) of the Yonsei university college of medicine (Approved animal  
57 experiment number : 2018-0155). Mice were randomly allocated to different groups (miRNA-  
58 control, n = 8; miR-371b-5p, n=7) and were subcutaneously inoculated with  $1 \times 10^6$  stable  
59 MDA MB-231-(miRNA control) and MDA-MB-231-(miR-371b-5p) cells into each flank  
60 under 150  $\mu$ l of saline/zoletil/rompun (7:1:1) anesthesia. From palpable tumor formation until  
61 termination, tumor sizes were measured every 2–3 days using calipers, and tumor volume was  
62 calculated using the following formula: length  $\times$  width<sup>2</sup>  $\times$  0.5236. Mice were sacrificed in a  
63 7.5% CO<sub>2</sub> chamber, and tumors were harvested for immunohistochemical and other analyses.

#### 64 **Cell lines**

65 MCF10A, SK-BR-3, T47D, BT-549, MDA-MB-157, and MDA-MB-468 cells were  
66 purchased from ATCC (Manassas, VA, USA). MCF7, ZR-75-1, HCC-1937, MDA-MB-231,  
67 and Hs578T cells were purchased and authenticated in the Korean Cell Line Bank (Seoul,  
68 Korea). All human breast cancer cells were characterized and authenticated in cell biology  
69 collection using short tandem repeat DNA profiles. Human breast cancer cells were grown in  
70 DMEM (SK-BR-3, MDA-MB-157, MDA-MB-468, and HEK293T) or RPMI (MCF7, T47D,  
71 BT-549, and MDA-MB-231) supplemented with 10% fetal bovine serum (FBS) (HyClone™,  
72 GE Healthcare, IL, USA). MCF10A breast cancer cells were maintained in DMEM/F-12 with  
73 25% horse serum (Gibco®, Thermo Fisher Scientific), 20 ng/ml EGF (Peprotech Inc., NJ,  
74 USA), 10  $\mu$ g/ml insulin (Sigma-Aldrich, MO, USA), 0.5  $\mu$ g/ml hydrocortisone (Sigma-

75 Aldrich), and 100 ng/ml cholera toxin (Sigma-Aldrich). The cell lines used in this study were  
76 grown in a humidified incubator at 37 °C and 5% CO<sub>2</sub>.

### 77 **Generation of stable cell lines**

78 Lentiviruses expressing miR-371b-5p and control miRNA (miR-con) vector were  
79 purchased from Applied Biological Materials, Inc. (BC, Canada). For generation of *CSDE1*-  
80 knockout cell lines, a sequence targeting *CSDE1* that has no predicted off-targets obtained from  
81 CHOPCHOP v2 (7, 8) was inserted into the lentiCRISPR v2 vector (Addgene, MA, USA).  
82 Lentivirus particles in the culture medium were harvested and added to cells with polybrene.  
83 After puromycin (Sigma-Aldrich) selection, a stable clone was obtained and confirmed through  
84 qRT-PCR and western blotting for further experiments.

### 85 **Transfection**

86 The miR-371b-5p mimic (miRVana™, Invitrogen) was reverse-transfected using the  
87 siPORT™ NeoFX™ Transfection Reagent (Invitrogen) according to the manufacturer's  
88 instructions. The control cells were transfected with miRVana™ miR-negative control mimic  
89 (Negative Control #1, Invitrogen). siRNA targeting *CSDE1* (Silencer siRNA, Invitrogen) and  
90 siRNA negative control (siRNA Negative Control #1, Invitrogen) were transfected using the  
91 Lipofectamine RNAiMAX Transfection Reagent (Invitrogen). Both the *CSDE1* (NM\_007158)  
92 vector (ORF size, 2301bp; RC207101, Origene®, USA) and Empty vector (Origene®) were  
93 transfected using the FuGENE® HD Transfection Reagent (Promega, USA), following the  
94 manufacturer's instructions.

### 95 **Immunoprecipitation**

96 Cells were lysed using lysis buffer (50 mM Tris-Cl, pH 7.5; 150 mM NaCl; 1 mM  
97 EDTA; 1% Triton X-100; 0.5% NP-40, and protease inhibitor) and incubated on ice for 5 min.  
98 Lysates were clarified by centrifugation for 15 min at 13,000 rpm at 4 °C. For  
99 immunoprecipitation, the supernatant was incubated with the primary antibody (Flag, F1804,

100 Sigma; CSDE1, NBP1-71915, Novus; RNAPII p-CTD Ser2, 61083, Active Motif; RNAPII p-  
101 CTD Ser5, ab5408, Abcam) at 4 °C overnight. Magnetic protein G beads (Invitrogen) were  
102 added to each sample and incubated at room temperature for 2h. Samples were pulled down  
103 and washed three times with wash buffer (50 mM Tris-Cl, pH 7.5; 150 mM NaCl; 1 mM EDTA;  
104 1% Triton X-100, and 0.5% NP-40). The samples were then boiled and loaded for further  
105 analysis.

### 106 **RNA immunoprecipitation (RIP) assay**

107 RIP experiments were performed according to protocol of a previous study (9). Briefly,  
108 cells were cross-linked using 1% formaldehyde, followed by addition of 0.2 M glycine. Each  
109 sample was centrifuged for 5 min at 4 °C. Cells were resuspended in ice-cold FA lysis buffer  
110 containing RNase inhibitor (Promega). The samples were then sonicated and centrifuged. Pre-  
111 cleared supernatant was incubated overnight with the primary antibodies under rotation at 4 °C.  
112 Anti-CSDE1 (NBP1-71915, Novus), anti-RNAPII Ser2 (ab238146, Abcam), anti-RNAPII ser5  
113 (ab5408, Abcam), anti-normal IgG (12-371, Merck, USA), and anti-Flag (F1804, Sigma) were  
114 incubated with protein A/G magnetic beads (Invitrogen) and stirred for 90 min at 4 °C. Pellet  
115 beads were washed with ice-cold FA500, LiCl, and TE buffers and eluted with RIP elution  
116 buffer containing RNase inhibitor for 10 min at 37 °C. Total RNA was then extracted using  
117 TRIzol® (Thermo Fisher Scientific, USA) and phenol:chloroform and reverse transcribed for  
118 further qRT-PCR analysis.

### 119 **RNA extraction and qRT-PCR**

120 Total RNA (500 ng) was isolated using the miRNAeasy kit (Qiagen, Germany)  
121 according to the manufacturer's instructions and reverse transcribed using the TaqMan®  
122 MicroRNA Reverse Transcription Kit (Applied Biosystems, Waltham, MA, USA) to detect  
123 miR-371b-5p expression. Quantitative RT-PCR (qRT-PCR) for miRNA analysis was  
124 performed with the TaqMan® Universal PCR Master Mix (Applied Biosystems) using the

125 LightCycler® System (Roche, Switzerland); RNU48 was used as an endogenous control. The  
126 mRNAs for qRT-PCR were extracted using the NucleoSpin® RNA/Protein kit (MACHEREY-  
127 NAGEL, Germany). Total RNA was reverse transcribed, and each target gene was detected  
128 using specific primers.

### 129 **Western blotting**

130 Western blotting was performed as previously described (10). Briefly, proteins were  
131 isolated using the NucleoSpin® RNA/Protein kit (MACHEREY-NAGEL). Proteins were  
132 separated on SDS-PAGE, transferred to PVDF membrane and subjected to immunoblotting.  
133 Primary antibodies used in this study were CSDE1 (1:1000, rabbit, ab96124, Abcam, UK),  
134 Rac1 (1:1000, mouse, ab33186, Abcam, UK), RNA pol II p-CTD (ser2) (1:1000, rat, 61083,  
135 Active Motif, USA; 1:1000, rabbit, ab238146, Abcam), RNA pol II p-CTD (ser5) (1:1000,  
136 mouse, ab5408, Abcam, UK), CDK7 (1:1000, mouse, #2916, Cell Signaling, USA), Flag  
137 (1:5000, rabbit, F7425, Sigma-Aldrich, USA), and  $\beta$ -actin (1:10000, rabbit, A300-491A,  
138 Bethyl Laboratories, USA).  $\beta$ -actin was used as a loading control. Immunoreactive proteins  
139 were detected by horseradish peroxidase-conjugated secondary antibodies (1:5000, ADI-SAB-  
140 100-J, ADI-SAB-300-J, Enzo Life Sciences, NY, USA) and the enhanced chemiluminescence  
141 reagent, EzWestLumi plus (ATTO, JAPAN), and analyzed by Amersham™ Imager 600 (GE  
142 healthcare, UK).

### 143 **Cell viability assay and Caspase-3 activation assay**

144 Cell viability was measured by the CCK-8 assay. Cells were transfected with miRNA  
145 or siRNA on a 24-well plate per group at a density. Following cell attachment, CCK-8 labeling  
146 mixture (Dojindo Molecular Technologies, Inc., Japan) was added to a single well for each  
147 group and incubated for 30 min at 37 °C in the dark. The absorbance at 450 nm was measured  
148 using a multi-well spectrophotometer (Synergy HTX; BioTek, VT, USA). Cells were harvested,

149 and caspase-3 activity was measured using ApoAlert Caspase Colorimetric kit (Clontech  
150 Laboratories, USA) according to the manufacturer's instructions.

### 151 **Cell cycle analysis**

152 Cells were transfected with miR-negative control mimic or miR-371b-5p mimic. After  
153 48 h, cells were washed, harvested with PBS, and fixed with 70% ethanol at 4 °C overnight.  
154 The fixed cells were then centrifuged and washed with PBS, resuspended with PI/RNase  
155 staining buffer (BD Biosciences, San Jose, CA, USA), and incubated at room temperature in  
156 the dark for 30 min. The DNA content was analyzed using a FACSCanto II flow cytometer  
157 (BD Biosciences).

### 158 **Wound healing assay**

159 The miRNA-transfected cells were incubated for 24 h in 6-well plates until they  
160 reached 100% confluence. After overnight incubation in complete medium, cells were  
161 scratched using a 200 µl pipette tip, washed with 0% FBS medium, and further incubated in 0%  
162 FBS medium. The wound healing area of each sample was calculated using the ImageJ  
163 software.

### 164 **Transwell cell migration and invasion assay**

165 The cells ( $5 \times 10^4$  cells/well) were seeded in upper chambers of the Transwell cell  
166 culture insert (Corning, NY, USA) and Matrigel Invasion Chambers (BD Biosciences) for the  
167 migration and invasion assays, respectively. The lower chambers contained culture medium  
168 supplemented with 10% FBS. After 24–48 h, non-migrated cells or invaded cells in upper  
169 chambers were removed using cotton swabs. The membranes were fixed and stained with 0.01%  
170 crystal violet (Sigma-Aldrich). The migrated or invaded cells were counted using the i-Solution  
171 software (IMT, Gyeongnam, Korea) or multi-well spectrophotometer (Synergy HTX; BioTek,  
172 VT, USA).

### 173 **Dual luciferase assay**

174 Human *CSDE1* 3'UTR, which included the predicted miR-371b-5p seed sequence and  
175 mutated seed sequences, was inserted into the psiCHECK™-2 vector (Promega, Madison, WI,  
176 USA) using the In-fusion® HD Cloning Kit (Clontech Laboratories, CA, USA). This luciferase  
177 reporter construct was transfected into HEK293T cells with 15–30 nM solution of miR-371b-  
178 5p mimics or negative control miRNA using Lipofectamine 2000 (Invitrogen) according to the  
179 manufacturer's instructions. After 48 h, all experimental cells were passively lysed, and  
180 reporter activity was measured using the Dual Luciferase Assay System (Promega). The  
181 following sizes and positions of the 3'UTR were used in this study: *CSDE1* (NM\_001007553;  
182 1<sup>st</sup> seed position, 1122-1128 of *CSDE1* 3'UTR; 2<sup>nd</sup> seed position, 1242-1248 of *CSDE1*  
183 3'UTR), *CDC7* (NM\_003503; 1<sup>st</sup> seed position, 1172-1178 of *CDC7* 3'UTR; 2<sup>nd</sup> seed position,  
184 822-828 of *CDC7* 3'UTR), *E2F2* (NM\_004091; 1<sup>st</sup> seed position, 1612-1619 of *E2F2* 3'UTR;  
185 2<sup>nd</sup> seed position, 2362-2368 of *E2F2* 3'UTR), *MCM4* (NM\_005914; 1<sup>st</sup> seed position, 738-  
186 744 of *MCM4* 3'UTR; 2<sup>nd</sup> seed position, 1000-1006 of *MCM4* 3'UTR), *NEK2* (NM\_002497;  
187 1<sup>st</sup> seed position, 432-428 of *NEK2* 3'UTR), *PAG1* (NM\_018440; 1<sup>st</sup> seed position, 2519 -  
188 2525 of *E2F2* 3'UTR; 2<sup>nd</sup> seed position, 6209 -6216 of *E2F2* 3'UTR).

### 189 **Immunohistochemistry and immunofluorescence analyses**

190 For immunohistochemistry analysis, paraffin-embedded slides were probed with the  
191 primary antibodies against Ki67 (1:200, rabbit, ab16667, Abcam, UK). Staining was visualized  
192 using NovaRED substrate (Vector Laboratories, Cambridgeshire, UK), followed by  
193 counterstaining with hematoxylin. For immunofluorescence analysis of paraffin-embedded  
194 slides, the primary antibodies against *CSDE1* (1µg/ml, rabbit, NBP2-38665, Novus; 1:500,  
195 rabbit, ab96124, Abcam, UK) and *RAC1* (1:100, mouse, ab33186, Abcam, UK) were incubated  
196 with slides overnight at 4 °C. For immunofluorescence staining, the cells were fixed with 10%  
197 neutral buffered formalin (BioSesang, Korea) and permeabilized with 0.2% Triton X-100  
198 containing 5% BSA. Thereafter, the cells were incubated overnight with the primary antibodies

199 (rhodamine-labeled phalloidin, 1:500, R415, Invitrogen; anti-CSDE1, 1:250, rabbit, ab96124,  
200 Abcam, UK; anti-Ki67, 1:250, rabbit, ab16667, Abcam, UK; DAPI, 1:1000, Invitrogen, MA,  
201 USA) at 4 °C. Fluorescent secondary antibodies (1:1000; A11032, A11034, and A11037,  
202 Invitrogen, MA, USA) were used to detect the primary antibodies. Immunofluorescence  
203 images were captured at a wavelength of 488 nm or 594 nm, using a confocal laser scanning  
204 microscope (LSM-700, Carl Zeiss).

#### 205 **Availability of data and materials**

206 The data that support the findings of this study are available from GSE154255, but  
207 restrictions apply to the availability of these data, which were used under license for the current  
208 study and therefore are not publicly available. Data are, however, available from the authors  
209 upon reasonable request and with permission of the corresponding author.

#### 210 **Statistical analysis**

211 Statistical analyses were performed using the GraphPad Prism 5 software. Data are  
212 presented as the mean  $\pm$  standard deviation (SD). All sample sizes were indicated in the  
213 corresponding figure. At least three biological or technical replicates were used for statistical  
214 analysis of *in vitro* experiments. For statistical analysis of *in vivo* data, at least four values (n=4)  
215 per group were used. The data were analyzed using a two-tailed unpaired student's t-test for  
216 comparison between different groups. Statistical significance was set at  $p < 0.05$  (\* $p < 0.05$ ,  
217 \*\* $p < 0.01$ , \*\*\* $p < 0.001$ ).

218

219

220

221 **References**

222

- 223 1. Son D, Kim Y, Lim S, Kang HG, Kim DH, Park JW, et al. miR-374a-5p promotes  
224 tumor progression by targeting ARRB1 in triple negative breast cancer. *Cancer Lett.*  
225 2019;454:224-33.
- 226 2. Lanczky A, Nagy A, Bottai G, Munkacsy G, Szabo A, Santarpia L, et al. miRpower: a  
227 web-tool to validate survival-associated miRNAs utilizing expression data from 2178 breast  
228 cancer patients. *Breast cancer research and treatment.* 2016;160(3):439-46.
- 229 3. Kim HY, Choi HJ, Lee JY, Kong G. Cancer Target Gene Screening: a web application  
230 for breast cancer target gene screening using multi-omics data analysis. *Brief Bioinform.*  
231 2020;21(2):663-75.
- 232 4. Gao J, Aksoy BA, Dogrusoz U, Dresdner G, Gross B, Sumer SO, et al. Integrative  
233 analysis of complex cancer genomics and clinical profiles using the cBioPortal. *Science*  
234 *signaling.* 2013;6(269):p11.
- 235 5. Cerami E, Gao J, Dogrusoz U, Gross BE, Sumer SO, Aksoy BA, et al. The cBio cancer  
236 genomics portal: an open platform for exploring multidimensional cancer genomics data.  
237 *Cancer discovery.* 2012;2(5):401-4.
- 238 6. Ciriello G, Gatza ML, Beck AH, Wilkerson MD, Rhie SK, Pastore A, et al.  
239 Comprehensive Molecular Portraits of Invasive Lobular Breast Cancer. *Cell.* 2015;163(2):506-  
240 19.
- 241 7. Labun K, Montague TG, Gagnon JA, Thyme SB, Valen E. CHOPCHOP v2: a web tool  
242 for the next generation of CRISPR genome engineering. *Nucleic acids research.*  
243 2016;44(W1):W272-6.
- 244 8. Montague TG, Cruz JM, Gagnon JA, Church GM, Valen E. CHOPCHOP: a  
245 CRISPR/Cas9 and TALEN web tool for genome editing. *Nucleic acids research.* 2014;42(Web  
246 Server issue):W401-7.
- 247 9. Selth LA, Gilbert C, Svejstrup JQ. RNA immunoprecipitation to determine RNA-  
248 protein associations in vivo. *Cold Spring Harbor protocols.* 2009;2009(6):pdb prot5234.
- 249 10. Park JW, Kim Y, Lee SB, Oh CW, Lee EJ, Ko JY, et al. Autophagy inhibits cancer  
250 stemness in triple-negative breast cancer via miR-181a-mediated regulation of ATG5 and/or  
251 ATG2B. *Mol Oncol.* 2022.

252
